# Supplementary material
Source: Springer Nature journal article supplement (https://www.springermedizin.de/resource/supplementary/12913_2012_3526_MOESM1_ESM.pdf/9533080)

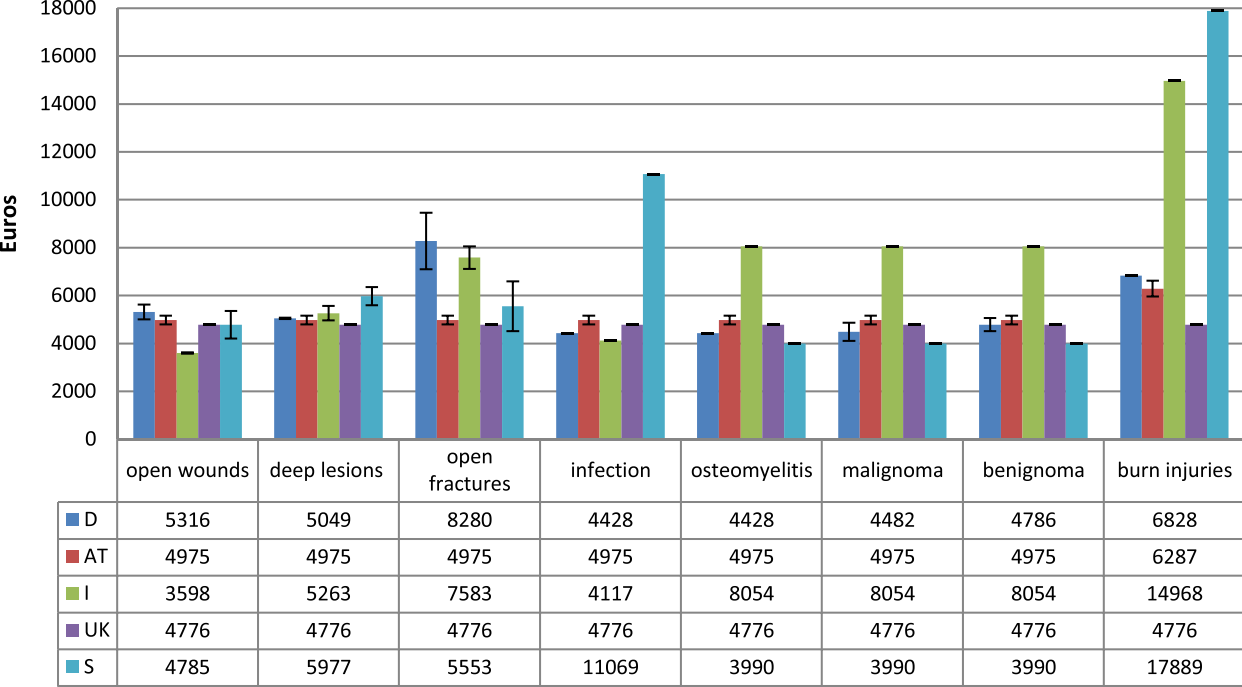

Supplement: MOESM1 [file 9533080]
